# Supplementary material for: The reaction between the methyl Criegee intermediate and hydrogen chloride: an FTMW spectroscopic study
Source: Royal Society of Chemistry journal article supplement (doi:10.1039/c8cp04171g), 2018-01-01

## Supplementary Material

### **The Reaction between the Methyl Criegee Intermediate and Hydrogen Chloride: an FTMW Spectroscopic Study**

Carlos Cabezas and Yasuki Endo \*

**Table SI.** Optimized geometries of the two conformers of CEHP.

|                                                             | <i>anti</i> -CEHP | <i>syn</i> -CEHP |
|-------------------------------------------------------------|-------------------|------------------|
| R <sub>H1O1</sub>                                           | 0.9670            | 0.9663           |
| R <sub>O1O2</sub>                                           | 1.4311            | 1.4328           |
| R <sub>O2C1</sub>                                           | 1.3884            | 1.3932           |
| R <sub>C1H2</sub>                                           | 1.0861            | 1.0870           |
| R <sub>C1C2</sub>                                           | 1.5085            | 1.5099           |
| R <sub>C2H3</sub>                                           | 1.0887            | 1.0864           |
| R <sub>C2H4</sub>                                           | 1.0899            | 1.0905           |
| R <sub>C2H5</sub>                                           | 1.0877            | 1.0884           |
| R <sub>C1Cl</sub>                                           | 1.8194            | 1.8160           |
| H <sub>1</sub> O <sub>1</sub> O <sub>2</sub>                | 101.214           | 100.859          |
| O <sub>1</sub> O <sub>2</sub> C <sub>1</sub>                | 108.041           | 109.002          |
| O <sub>2</sub> C <sub>1</sub> H <sub>1</sub>                | 110.432           | 103.200          |
| O <sub>2</sub> C <sub>1</sub> C <sub>2</sub>                | 107.332           | 114.906          |
| C <sub>1</sub> C <sub>2</sub> H <sub>3</sub>                | 110.008           | 110.684          |
| C <sub>1</sub> C <sub>2</sub> H <sub>4</sub>                | 109.198           | 108.760          |
| C <sub>1</sub> C <sub>2</sub> H <sub>5</sub>                | 109.640           | 109.442          |
| O <sub>2</sub> C <sub>1</sub> Cl                            | 110.933           | 110.201          |
| H <sub>1</sub> O <sub>1</sub> O <sub>2</sub> C <sub>1</sub> | -86.987           | 90.699           |
| O <sub>1</sub> O <sub>2</sub> C <sub>1</sub> H <sub>2</sub> | -43.677           | 176.983          |
| O <sub>1</sub> O <sub>2</sub> C <sub>1</sub> C <sub>2</sub> | -168.591          | 53.894           |
| O <sub>2</sub> C <sub>1</sub> C <sub>2</sub> H <sub>3</sub> | -57.897           | -65.617          |
| O <sub>2</sub> C <sub>1</sub> C <sub>2</sub> H <sub>4</sub> | 62.168            | 54.475           |
| O <sub>2</sub> C <sub>1</sub> C <sub>2</sub> H <sub>5</sub> | 182.136           | 173.917          |
| O <sub>1</sub> O <sub>2</sub> C <sub>1</sub> Cl             | 71.609            | -70.837          |

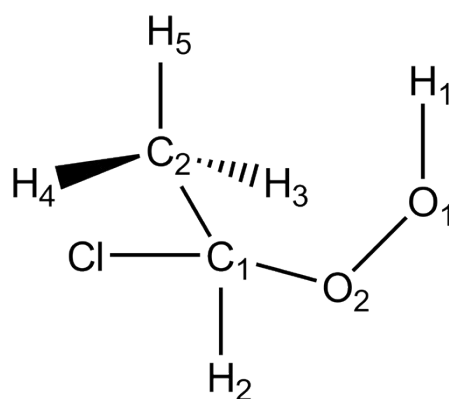

**Table SII.** Observed transition frequencies for the  $^{35}\text{Cl}$  isotopic species for the conformer *anti*-CEHP.

| J' | K <sub>a</sub> ' | K <sub>c</sub> ' | F'  | J'' | K <sub>a</sub> '' | K <sub>c</sub> '' | F'' | $\nu_{\text{obs.}}$ | $\nu_{\text{obs.}}-\nu_{\text{cal.}}$ |
|----|------------------|------------------|-----|-----|-------------------|-------------------|-----|---------------------|---------------------------------------|
| 2  | 0                | 2                | 2.5 | 1   | 0                 | 1                 | 2.5 | 10729.191           | -2                                    |
| 2  | 0                | 2                | 2.5 | 1   | 0                 | 1                 | 1.5 | 10729.687           | 2                                     |
| 2  | 0                | 2                | 1.5 | 1   | 0                 | 1                 | 0.5 | 10732.004           | 3                                     |
| 2  | 0                | 2                | 1.5 | 1   | 0                 | 1                 | 2.5 | 10732.265           | -3                                    |
| 2  | 0                | 2                | 1.5 | 1   | 0                 | 1                 | 1.5 | 10732.762           | 1                                     |
| 2  | 0                | 2                | 3.5 | 1   | 0                 | 1                 | 2.5 | 10733.473           | 1                                     |
| 2  | 0                | 2                | 0.5 | 1   | 0                 | 1                 | 0.5 | 10736.266           | 1                                     |
| 2  | 0                | 2                | 0.5 | 1   | 0                 | 1                 | 1.5 | 10737.022           | -2                                    |
| 2  | 1                | 2                | 2.5 | 1   | 0                 | 1                 | 2.5 | 11326.545           | -1                                    |
| 2  | 1                | 2                | 2.5 | 1   | 0                 | 1                 | 1.5 | 11327.041           | 3                                     |
| 2  | 1                | 2                | 1.5 | 1   | 0                 | 1                 | 0.5 | 11331.219           | 3                                     |
| 2  | 1                | 2                | 1.5 | 1   | 0                 | 1                 | 2.5 | 11331.480           | -3                                    |
| 2  | 1                | 2                | 1.5 | 1   | 0                 | 1                 | 1.5 | 11331.978           | 2                                     |
| 2  | 1                | 2                | 3.5 | 1   | 0                 | 1                 | 2.5 | 11333.440           | 2                                     |
| 2  | 1                | 2                | 0.5 | 1   | 0                 | 1                 | 0.5 | 11338.100           | 1                                     |
| 2  | 1                | 1                | 1.5 | 1   | 1                 | 0                 | 1.5 | 12702.144           | -1                                    |
| 2  | 1                | 1                | 2.5 | 1   | 1                 | 0                 | 1.5 | 12706.749           | 1                                     |
| 2  | 1                | 1                | 3.5 | 1   | 1                 | 0                 | 2.5 | 12707.202           | 4                                     |
| 2  | 1                | 1                | 0.5 | 1   | 1                 | 0                 | 0.5 | 12708.083           | -1                                    |
| 2  | 1                | 1                | 2.5 | 1   | 1                 | 0                 | 2.5 | 12713.651           | 1                                     |
| 2  | 1                | 1                | 1.5 | 1   | 1                 | 0                 | 0.5 | 12714.548           | 0                                     |
| 3  | 0                | 3                | 3.5 | 2   | 1                 | 2                 | 3.5 | 14496.948           | -3                                    |
| 3  | 0                | 3                | 2.5 | 2   | 1                 | 2                 | 1.5 | 14502.272           | -1                                    |
| 3  | 0                | 3                | 1.5 | 2   | 1                 | 2                 | 0.5 | 14502.601           | 0                                     |
| 3  | 0                | 3                | 3.5 | 2   | 1                 | 2                 | 2.5 | 14503.842           | 0                                     |
| 3  | 0                | 3                | 4.5 | 2   | 1                 | 2                 | 3.5 | 14504.151           | 0                                     |
| 3  | 0                | 3                | 2.5 | 2   | 1                 | 2                 | 2.5 | 14507.209           | -2                                    |
| 3  | 1                | 3                | 3.5 | 2   | 1                 | 2                 | 3.5 | 14690.483           | -2                                    |
| 3  | 1                | 3                | 2.5 | 2   | 1                 | 2                 | 1.5 | 14696.165           | -1                                    |
| 3  | 1                | 3                | 1.5 | 2   | 1                 | 2                 | 0.5 | 14697.259           | 2                                     |
| 3  | 1                | 3                | 3.5 | 2   | 1                 | 2                 | 2.5 | 14697.378           | 1                                     |
| 3  | 1                | 3                | 4.5 | 2   | 1                 | 2                 | 3.5 | 14698.451           | 1                                     |
| 3  | 1                | 3                | 2.5 | 2   | 1                 | 2                 | 2.5 | 14701.101           | -2                                    |
| 3  | 0                | 3                | 3.5 | 2   | 0                 | 2                 | 3.5 | 15096.914           | -3                                    |
| 3  | 0                | 3                | 3.5 | 2   | 0                 | 2                 | 2.5 | 15101.196           | 1                                     |
| 3  | 0                | 3                | 2.5 | 2   | 0                 | 2                 | 1.5 | 15101.487           | -1                                    |
| 3  | 0                | 3                | 4.5 | 2   | 0                 | 2                 | 3.5 | 15104.118           | 1                                     |
| 3  | 0                | 3                | 1.5 | 2   | 0                 | 2                 | 0.5 | 15104.434           | -1                                    |
| 3  | 0                | 3                | 2.5 | 2   | 0                 | 2                 | 2.5 | 15104.562           | -2                                    |
| 3  | 0                | 3                | 1.5 | 2   | 0                 | 2                 | 1.5 | 15108.697           | -2                                    |
| 3  | 1                | 3                | 3.5 | 2   | 0                 | 2                 | 3.5 | 15290.450           | -2                                    |
| 3  | 1                | 3                | 3.5 | 2   | 0                 | 2                 | 2.5 | 15294.732           | 2                                     |
| 3  | 1                | 3                | 2.5 | 2   | 0                 | 2                 | 1.5 | 15295.380           | 0                                     |
| 3  | 1                | 3                | 4.5 | 2   | 0                 | 2                 | 3.5 | 15298.418           | 2                                     |
| 3  | 1                | 3                | 2.5 | 2   | 0                 | 2                 | 2.5 | 15298.452           | -4                                    |
| 3  | 1                | 3                | 1.5 | 2   | 0                 | 2                 | 0.5 | 15299.091           | 0                                     |
| 3  | 1                | 3                | 1.5 | 2   | 0                 | 2                 | 1.5 | 15303.353           | -2                                    |
| 2  | 2                | 1                | 1.5 | 1   | 1                 | 0                 | 1.5 | 16631.977           | -3                                    |
| 2  | 2                | 1                | 2.5 | 1   | 1                 | 0                 | 1.5 | 16632.314           | 1                                     |
| 2  | 2                | 1                | 3.5 | 1   | 1                 | 0                 | 2.5 | 16638.757           | 2                                     |

|   |   |   |     |   |   |   |     |           |    |
|---|---|---|-----|---|---|---|-----|-----------|----|
| 2 | 2 | 1 | 2.5 | 1 | 1 | 0 | 2.5 | 16639.214 | -1 |
| 2 | 2 | 1 | 0.5 | 1 | 1 | 0 | 0.5 | 16643.984 | -3 |
| 2 | 2 | 1 | 1.5 | 1 | 1 | 0 | 0.5 | 16644.382 | -2 |
| 3 | 2 | 2 | 3.5 | 2 | 2 | 1 | 2.5 | 17046.592 | 8  |
| 3 | 2 | 2 | 1.5 | 2 | 2 | 1 | 2.5 | 17046.592 | 2  |
| 3 | 2 | 2 | 1.5 | 2 | 2 | 1 | 1.5 | 17046.922 | -2 |
| 3 | 2 | 2 | 3.5 | 2 | 2 | 1 | 3.5 | 17047.046 | 2  |
| 3 | 2 | 2 | 1.5 | 2 | 2 | 1 | 0.5 | 17047.327 | 7  |
| 2 | 2 | 0 | 1.5 | 1 | 1 | 0 | 1.5 | 17264.264 | -5 |
| 2 | 2 | 0 | 2.5 | 1 | 1 | 0 | 1.5 | 17267.341 | -1 |
| 2 | 2 | 0 | 3.5 | 1 | 1 | 0 | 2.5 | 17269.948 | 1  |
| 2 | 2 | 0 | 0.5 | 1 | 1 | 0 | 0.5 | 17272.423 | -4 |
| 2 | 2 | 0 | 2.5 | 1 | 1 | 0 | 2.5 | 17274.242 | -2 |
| 2 | 2 | 0 | 1.5 | 1 | 1 | 0 | 0.5 | 17276.671 | -2 |
| 3 | 1 | 2 | 2.5 | 2 | 1 | 1 | 2.5 | 18510.798 | 1  |
| 3 | 1 | 2 | 1.5 | 2 | 1 | 1 | 1.5 | 18511.048 | 3  |
| 3 | 1 | 2 | 3.5 | 2 | 1 | 1 | 2.5 | 18512.840 | 4  |
| 3 | 1 | 2 | 4.5 | 2 | 1 | 1 | 3.5 | 18514.922 | 5  |
| 3 | 1 | 2 | 2.5 | 2 | 1 | 1 | 1.5 | 18515.404 | 4  |
| 3 | 1 | 2 | 1.5 | 2 | 1 | 1 | 0.5 | 18517.512 | 3  |
| 3 | 1 | 2 | 3.5 | 2 | 1 | 1 | 3.5 | 18519.290 | 2  |
| 2 | 2 | 0 | 0.5 | 1 | 1 | 1 | 0.5 | 18602.059 | 3  |
| 2 | 2 | 0 | 1.5 | 1 | 1 | 1 | 0.5 | 18606.305 | 2  |
| 2 | 2 | 0 | 3.5 | 1 | 1 | 1 | 2.5 | 18610.320 | 3  |
| 2 | 2 | 0 | 2.5 | 1 | 1 | 1 | 2.5 | 18614.613 | 1  |
| 2 | 2 | 0 | 1.5 | 1 | 1 | 1 | 1.5 | 18617.947 | 0  |
| 2 | 2 | 0 | 2.5 | 1 | 1 | 1 | 1.5 | 18621.024 | 3  |
| 3 | 2 | 1 | 1.5 | 2 | 2 | 0 | 1.5 | 18985.390 | -5 |
| 3 | 2 | 1 | 2.5 | 2 | 2 | 0 | 2.5 | 18989.077 | -7 |
| 3 | 2 | 1 | 1.5 | 2 | 2 | 0 | 0.5 | 18989.637 | -4 |
| 3 | 2 | 1 | 4.5 | 2 | 2 | 0 | 3.5 | 18989.766 | -3 |
| 3 | 2 | 1 | 2.5 | 2 | 2 | 0 | 1.5 | 18992.153 | -4 |
| 3 | 2 | 1 | 3.5 | 2 | 2 | 0 | 2.5 | 18992.240 | -3 |
| 4 | 1 | 4 | 3.5 | 3 | 1 | 3 | 2.5 | 19181.175 | 0  |
| 4 | 1 | 4 | 4.5 | 3 | 1 | 3 | 3.5 | 19181.754 | 1  |
| 4 | 1 | 4 | 2.5 | 3 | 1 | 3 | 1.5 | 19182.170 | 1  |
| 4 | 1 | 4 | 5.5 | 3 | 1 | 3 | 4.5 | 19182.750 | 1  |
| 4 | 0 | 4 | 3.5 | 3 | 0 | 3 | 2.5 | 19323.581 | 0  |
| 4 | 0 | 4 | 4.5 | 3 | 0 | 3 | 3.5 | 19323.865 | 1  |
| 4 | 0 | 4 | 2.5 | 3 | 0 | 3 | 1.5 | 19325.162 | -1 |
| 4 | 0 | 4 | 5.5 | 3 | 0 | 3 | 4.5 | 19325.449 | 1  |
| 4 | 0 | 4 | 3.5 | 3 | 0 | 3 | 3.5 | 19326.948 | -1 |
| 4 | 0 | 4 | 2.5 | 3 | 0 | 3 | 2.5 | 19332.371 | -2 |

**Table SIII.** Observed transition frequencies for the  $^{37}\text{Cl}$  isotopic species for the conformer *anti*-CEHP.

| $J'$ | $K_a'$ | $K_c'$ | $F'$ | $J''$ | $K_a''$ | $K_c''$ | $F''$ | $\nu_{\text{obs.}}$ | $\nu_{\text{obs.}} - \nu_{\text{cal.}}$ |
|------|--------|--------|------|-------|---------|---------|-------|---------------------|-----------------------------------------|
| 2    | 0      | 2      | 2.5  | 1     | 0       | 1       | 2.5   | 10552.903           | -1                                      |
| 2    | 0      | 2      | 2.5  | 1     | 0       | 1       | 1.5   | 10554.125           | 2                                       |
| 2    | 0      | 2      | 1.5  | 1     | 0       | 1       | 0.5   | 10554.769           | 4                                       |
| 2    | 0      | 2      | 3.5  | 1     | 0       | 1       | 2.5   | 10556.745           | 1                                       |
| 2    | 0      | 2      | 1.5  | 1     | 0       | 1       | 1.5   | 10556.879           | 1                                       |
| 2    | 1      | 2      | 2.5  | 1     | 0       | 1       | 2.5   | 11153.082           | 1                                       |
| 2    | 1      | 2      | 2.5  | 1     | 0       | 1       | 1.5   | 11154.303           | 3                                       |
| 2    | 1      | 2      | 1.5  | 1     | 0       | 1       | 0.5   | 11156.076           | -5                                      |
| 2    | 1      | 2      | 1.5  | 1     | 0       | 1       | 1.5   | 11158.199           | 1                                       |
| 2    | 1      | 2      | 3.5  | 1     | 0       | 1       | 2.5   | 11158.527           | 1                                       |
| 2    | 1      | 2      | 0.5  | 1     | 0       | 1       | 0.5   | 11161.523           | 1                                       |
| 2    | 1      | 1      | 1.5  | 1     | 1       | 0       | 1.5   | 12486.867           | 1                                       |
| 2    | 1      | 1      | 2.5  | 1     | 1       | 0       | 1.5   | 12489.907           | 2                                       |
| 2    | 1      | 1      | 3.5  | 1     | 1       | 0       | 2.5   | 12491.100           | 3                                       |
| 2    | 1      | 1      | 0.5  | 1     | 1       | 0       | 0.5   | 12492.397           | -1                                      |
| 2    | 1      | 1      | 2.5  | 1     | 1       | 0       | 2.5   | 12495.355           | 1                                       |
| 2    | 1      | 1      | 1.5  | 1     | 1       | 0       | 0.5   | 12496.666           | 1                                       |
| 3    | 0      | 3      | 2.5  | 2     | 1       | 2       | 1.5   | 14255.266           | -2                                      |
| 3    | 0      | 3      | 1.5  | 2     | 1       | 2       | 0.5   | 14255.751           | -2                                      |
| 3    | 0      | 3      | 3.5  | 2     | 1       | 2       | 2.5   | 14256.399           | -1                                      |
| 3    | 0      | 3      | 4.5  | 2     | 1       | 2       | 3.5   | 14256.871           | -1                                      |
| 3    | 0      | 3      | 2.5  | 2     | 1       | 2       | 2.5   | 14259.163           | -3                                      |
| 3    | 0      | 3      | 1.5  | 2     | 1       | 2       | 1.5   | 14261.187           | -4                                      |
| 3    | 1      | 3      | 2.5  | 2     | 1       | 2       | 1.5   | 14451.823           | -1                                      |
| 3    | 1      | 3      | 3.5  | 2     | 1       | 2       | 2.5   | 14452.724           | -1                                      |
| 3    | 1      | 3      | 1.5  | 2     | 1       | 2       | 0.5   | 14452.802           | 2                                       |
| 3    | 1      | 3      | 4.5  | 2     | 1       | 2       | 3.5   | 14453.689           | 0                                       |
| 3    | 0      | 3      | 2.5  | 2     | 0       | 2       | 1.5   | 14856.576           | -1                                      |
| 3    | 0      | 3      | 3.5  | 2     | 0       | 2       | 2.5   | 14856.587           | 1                                       |
| 3    | 0      | 3      | 4.5  | 2     | 0       | 2       | 3.5   | 14858.653           | 0                                       |
| 3    | 0      | 3      | 1.5  | 2     | 0       | 2       | 0.5   | 14858.681           | 3                                       |
| 3    | 0      | 3      | 2.5  | 2     | 0       | 2       | 2.5   | 14859.342           | -2                                      |
| 3    | 1      | 3      | 3.5  | 2     | 0       | 2       | 3.5   | 15049.060           | -1                                      |
| 3    | 1      | 3      | 2.5  | 2     | 0       | 2       | 1.5   | 15053.142           | -1                                      |
| 3    | 1      | 3      | 4.5  | 2     | 0       | 2       | 3.5   | 15055.471           | 1                                       |
| 3    | 1      | 3      | 1.5  | 2     | 0       | 2       | 0.5   | 15055.726           | 0                                       |
| 3    | 1      | 3      | 2.5  | 2     | 0       | 2       | 2.5   | 15055.897           | -2                                      |
| 3    | 1      | 3      | 1.5  | 2     | 0       | 2       | 1.5   | 15059.557           | -1                                      |
| 2    | 2      | 1      | 1.5  | 1     | 1       | 0       | 1.5   | 16399.436           | -3                                      |
| 2    | 2      | 1      | 2.5  | 1     | 1       | 0       | 1.5   | 16400.299           | 0                                       |
| 2    | 2      | 1      | 3.5  | 1     | 1       | 0       | 2.5   | 16404.551           | 1                                       |
| 2    | 2      | 1      | 2.5  | 1     | 1       | 0       | 2.5   | 16405.748           | -1                                      |
| 2    | 2      | 1      | 0.5  | 1     | 1       | 0       | 0.5   | 16408.078           | -2                                      |
| 2    | 2      | 1      | 1.5  | 1     | 1       | 0       | 0.5   | 16409.235           | -2                                      |
| 3    | 2      | 2      | 2.5  | 2     | 2       | 1       | 2.5   | 16757.297           | 6                                       |
| 3    | 2      | 2      | 3.5  | 2     | 2       | 1       | 2.5   | 16757.297           | 3                                       |
| 3    | 2      | 2      | 2.5  | 2     | 2       | 1       | 1.5   | 16758.154           | 3                                       |
| 3    | 2      | 2      | 1.5  | 2     | 2       | 1       | 1.5   | 16758.154           | -3                                      |
| 3    | 2      | 2      | 4.5  | 2     | 2       | 1       | 3.5   | 16758.492           | 4                                       |
| 3    | 2      | 2      | 3.5  | 2     | 2       | 1       | 3.5   | 16758.492           | 0                                       |

|   |   |   |     |   |   |   |     |           |    |
|---|---|---|-----|---|---|---|-----|-----------|----|
| 3 | 2 | 2 | 1.5 | 2 | 2 | 1 | 0.5 | 16759.315 | 1  |
| 3 | 1 | 2 | 2.5 | 2 | 1 | 1 | 2.5 | 18202.983 | 0  |
| 3 | 1 | 2 | 1.5 | 2 | 1 | 1 | 1.5 | 18203.417 | 3  |
| 3 | 1 | 2 | 3.5 | 2 | 1 | 1 | 2.5 | 18204.207 | 4  |
| 3 | 1 | 2 | 4.5 | 2 | 1 | 1 | 3.5 | 18205.850 | 5  |
| 3 | 1 | 2 | 2.5 | 2 | 1 | 1 | 1.5 | 18206.024 | 3  |
| 3 | 1 | 2 | 1.5 | 2 | 1 | 1 | 0.5 | 18207.684 | 3  |
| 3 | 1 | 2 | 3.5 | 2 | 1 | 1 | 3.5 | 18208.463 | 2  |
| 2 | 2 | 0 | 0.5 | 1 | 1 | 1 | 0.5 | 18331.014 | 0  |
| 2 | 2 | 0 | 1.5 | 1 | 1 | 1 | 0.5 | 18334.835 | 0  |
| 2 | 2 | 0 | 2.5 | 1 | 1 | 1 | 2.5 | 18341.044 | 0  |
| 2 | 2 | 0 | 1.5 | 1 | 1 | 1 | 1.5 | 18342.522 | 2  |
| 2 | 2 | 0 | 2.5 | 1 | 1 | 1 | 1.5 | 18345.275 | 1  |
| 3 | 2 | 1 | 2.5 | 2 | 2 | 0 | 2.5 | 18656.608 | -6 |
| 3 | 2 | 1 | 4.5 | 2 | 2 | 0 | 3.5 | 18657.935 | -4 |
| 3 | 2 | 1 | 1.5 | 2 | 2 | 0 | 0.5 | 18658.452 | -5 |
| 3 | 2 | 1 | 3.5 | 2 | 2 | 0 | 2.5 | 18658.821 | -3 |
| 3 | 2 | 1 | 2.5 | 2 | 2 | 0 | 1.5 | 18659.364 | -4 |
| 4 | 1 | 4 | 3.5 | 3 | 1 | 3 | 2.5 | 18863.943 | 0  |
| 4 | 1 | 4 | 4.5 | 3 | 1 | 3 | 3.5 | 18864.414 | 1  |
| 4 | 1 | 4 | 2.5 | 3 | 1 | 3 | 1.5 | 18864.730 | 0  |
| 4 | 1 | 4 | 5.5 | 3 | 1 | 3 | 4.5 | 18865.200 | 1  |
| 4 | 0 | 4 | 3.5 | 3 | 0 | 3 | 2.5 | 19007.782 | -1 |
| 4 | 0 | 4 | 4.5 | 3 | 0 | 3 | 3.5 | 19008.063 | 0  |
| 4 | 0 | 4 | 2.5 | 3 | 0 | 3 | 1.5 | 19008.944 | -1 |
| 4 | 0 | 4 | 5.5 | 3 | 0 | 3 | 4.5 | 19009.229 | 2  |

**Table SIV.** Observed transition frequencies for the  $^{35}\text{Cl}$  isotopic species for the conformer *syn*-CEHP.

| J' | K <sub>a</sub> ' | K <sub>c</sub> ' | F'  | J'' | K <sub>a</sub> '' | K <sub>c</sub> '' | F'' | V <sub>obs.</sub> | V <sub>obs.</sub> -V <sub>cal.</sub> |
|----|------------------|------------------|-----|-----|-------------------|-------------------|-----|-------------------|--------------------------------------|
| 2  | 1                | 2                | 2.5 | 1   | 1                 | 1                 | 1.5 | 10575.274         | 4                                    |
| 2  | 1                | 2                | 1.5 | 1   | 1                 | 1                 | 1.5 | 10579.363         | -3                                   |
| 2  | 1                | 2                | 3.5 | 1   | 1                 | 1                 | 2.5 | 10582.605         | 1                                    |
| 2  | 0                | 2                | 2.5 | 1   | 0                 | 1                 | 2.5 | 11147.281         | 2                                    |
| 2  | 0                | 2                | 0.5 | 1   | 0                 | 1                 | 0.5 | 11154.642         | 1                                    |
| 2  | 0                | 2                | 2.5 | 1   | 0                 | 1                 | 1.5 | 11154.642         | 2                                    |
| 2  | 0                | 2                | 3.5 | 1   | 0                 | 1                 | 2.5 | 11154.961         | -4                                   |
| 2  | 0                | 2                | 1.5 | 1   | 0                 | 1                 | 1.5 | 11160.138         | -3                                   |
| 2  | 1                | 1                | 2.5 | 1   | 1                 | 0                 | 1.5 | 12037.129         | 0                                    |
| 2  | 1                | 1                | 1.5 | 1   | 1                 | 0                 | 1.5 | 12038.282         | 2                                    |
| 2  | 1                | 1                | 2.5 | 1   | 1                 | 0                 | 2.5 | 12042.861         | 0                                    |
| 2  | 1                | 1                | 1.5 | 1   | 1                 | 0                 | 0.5 | 12048.541         | -2                                   |
| 2  | 1                | 1                | 0.5 | 1   | 1                 | 0                 | 0.5 | 12050.160         | -3                                   |
| 2  | 1                | 2                | 1.5 | 1   | 0                 | 1                 | 0.5 | 12713.576         | -3                                   |
| 2  | 1                | 2                | 2.5 | 1   | 0                 | 1                 | 2.5 | 12715.290         | -1                                   |
| 2  | 1                | 2                | 0.5 | 1   | 0                 | 1                 | 0.5 | 12719.268         | 2                                    |
| 2  | 1                | 2                | 3.5 | 1   | 0                 | 1                 | 2.5 | 12721.003         | 1                                    |
| 2  | 1                | 2                | 2.5 | 1   | 0                 | 1                 | 1.5 | 12722.647         | 1                                    |
| 2  | 1                | 2                | 1.5 | 1   | 0                 | 1                 | 1.5 | 12726.737         | -1                                   |
| 3  | 0                | 3                | 3.5 | 2   | 1                 | 2                 | 3.5 | 14806.765         | -2                                   |
| 3  | 0                | 3                | 2.5 | 2   | 1                 | 2                 | 1.5 | 14812.193         | -1                                   |
| 3  | 0                | 3                | 3.5 | 2   | 1                 | 2                 | 2.5 | 14812.478         | 1                                    |
| 3  | 0                | 3                | 1.5 | 2   | 1                 | 2                 | 0.5 | 14814.651         | 0                                    |
| 3  | 0                | 3                | 4.5 | 2   | 1                 | 2                 | 3.5 | 14814.913         | 1                                    |
| 3  | 0                | 3                | 2.5 | 2   | 1                 | 2                 | 2.5 | 14816.283         | 0                                    |
| 3  | 0                | 3                | 1.5 | 2   | 1                 | 2                 | 1.5 | 14820.344         | -1                                   |
| 3  | 1                | 3                | 3.5 | 2   | 0                 | 2                 | 3.5 | 17340.459         | -1                                   |
| 3  | 1                | 3                | 1.5 | 2   | 0                 | 2                 | 0.5 | 17346.180         | 1                                    |
| 3  | 1                | 3                | 2.5 | 2   | 0                 | 2                 | 1.5 | 17346.207         | -1                                   |
| 3  | 1                | 3                | 4.5 | 2   | 0                 | 2                 | 3.5 | 17348.098         | 2                                    |
| 3  | 1                | 3                | 3.5 | 2   | 0                 | 2                 | 2.5 | 17348.140         | 1                                    |
| 3  | 1                | 3                | 2.5 | 2   | 0                 | 2                 | 2.5 | 17351.707         | 4                                    |
| 3  | 1                | 3                | 1.5 | 2   | 0                 | 2                 | 1.5 | 17353.845         | -2                                   |
| 2  | 2                | 1                | 0.5 | 1   | 1                 | 0                 | 0.5 | 18461.759         | 2                                    |
| 2  | 2                | 1                | 3.5 | 1   | 1                 | 0                 | 2.5 | 18462.438         | -6                                   |
| 2  | 2                | 1                | 2.5 | 1   | 1                 | 0                 | 1.5 | 18464.040         | 3                                    |
| 2  | 2                | 0                | 3.5 | 1   | 1                 | 1                 | 2.5 | 19350.152         | 1                                    |
| 2  | 2                | 0                | 1.5 | 1   | 1                 | 1                 | 1.5 | 19350.721         | -8                                   |
| 2  | 2                | 0                | 1.5 | 1   | 1                 | 1                 | 0.5 | 19353.626         | 1                                    |
| 2  | 2                | 0                | 2.5 | 1   | 1                 | 1                 | 1.5 | 19356.225         | -4                                   |
| 4  | 0                | 4                | 3.5 | 3   | 1                 | 3                 | 2.5 | 20386.389         | 1                                    |
| 4  | 0                | 4                | 4.5 | 3   | 1                 | 3                 | 3.5 | 20386.933         | 1                                    |
| 4  | 0                | 4                | 2.5 | 3   | 1                 | 3                 | 1.5 | 20387.378         | 3                                    |
| 4  | 0                | 4                | 5.5 | 3   | 1                 | 3                 | 4.5 | 20387.923         | 4                                    |
| 4  | 1                | 4                | 3.5 | 3   | 0                 | 3                 | 2.5 | 21867.355         | -2                                   |
| 4  | 1                | 4                | 2.5 | 3   | 0                 | 3                 | 1.5 | 21867.710         | 3                                    |
| 4  | 1                | 4                | 4.5 | 3   | 0                 | 3                 | 3.5 | 21868.182         | 6                                    |
| 4  | 1                | 4                | 5.5 | 3   | 0                 | 3                 | 4.5 | 21868.535         | 2                                    |
| 4  | 1                | 4                | 3.5 | 3   | 0                 | 3                 | 3.5 | 21871.164         | 0                                    |
| 4  | 1                | 4                | 2.5 | 3   | 0                 | 3                 | 2.5 | 21875.861         | -5                                   |

|   |   |   |     |   |   |   |     |           |    |
|---|---|---|-----|---|---|---|-----|-----------|----|
| 3 | 2 | 2 | 1.5 | 2 | 1 | 1 | 0.5 | 23386.507 | 3  |
| 3 | 2 | 2 | 4.5 | 2 | 1 | 1 | 3.5 | 23387.664 | -5 |
| 3 | 2 | 2 | 3.5 | 2 | 1 | 1 | 3.5 | 23387.664 | 0  |
| 3 | 2 | 2 | 2.5 | 2 | 1 | 1 | 1.5 | 23388.118 | -3 |
| 3 | 2 | 2 | 1.5 | 2 | 1 | 1 | 1.5 | 23388.118 | 2  |
| 3 | 2 | 2 | 2.5 | 2 | 1 | 1 | 2.5 | 23389.276 | 1  |
| 3 | 2 | 2 | 3.5 | 2 | 1 | 1 | 2.5 | 23389.276 | 1  |

**Table SV.** Observed transition frequencies for the  $^{37}\text{Cl}$  isotopic species for the conformer *syn*-CEHP.

| $J'$ | $K_a'$ | $K_c'$ | $F'$ | $J''$ | $K_a''$ | $K_c''$ | $F''$ | $\nu_{\text{obs.}}$ | $\nu_{\text{obs.}} - \nu_{\text{cal.}}$ |
|------|--------|--------|------|-------|---------|---------|-------|---------------------|-----------------------------------------|
| 2    | 0      | 2      | 1.5  | 1     | 0       | 1       | 0.5   | 10909.143           | 1                                       |
| 2    | 0      | 2      | 0.5  | 1     | 0       | 1       | 0.5   | 10915.414           | -3                                      |
| 2    | 0      | 2      | 2.5  | 1     | 0       | 1       | 1.5   | 10915.497           | 0                                       |
| 2    | 0      | 2      | 3.5  | 1     | 0       | 1       | 2.5   | 10915.723           | 2                                       |
| 2    | 1      | 2      | 1.5  | 1     | 0       | 1       | 0.5   | 12550.125           | 0                                       |
| 2    | 1      | 2      | 2.5  | 1     | 0       | 1       | 2.5   | 12551.673           | 4                                       |
| 2    | 1      | 2      | 0.5  | 1     | 0       | 1       | 0.5   | 12554.651           | -2                                      |
| 2    | 1      | 2      | 3.5  | 1     | 0       | 1       | 2.5   | 12556.213           | 0                                       |
| 2    | 1      | 2      | 2.5  | 1     | 0       | 1       | 1.5   | 12557.731           | 0                                       |
| 2    | 1      | 2      | 1.5  | 1     | 0       | 1       | 1.5   | 12560.983           | 2                                       |
| 3    | 0      | 3      | 3.5  | 2     | 1       | 2       | 3.5   | 14403.216           | 0                                       |
| 3    | 0      | 3      | 2.5  | 2     | 1       | 2       | 1.5   | 14407.590           | -3                                      |
| 3    | 0      | 3      | 3.5  | 2     | 1       | 2       | 2.5   | 14407.754           | -2                                      |
| 3    | 0      | 3      | 1.5  | 2     | 1       | 2       | 0.5   | 14409.668           | -1                                      |
| 3    | 0      | 3      | 4.5  | 2     | 1       | 2       | 3.5   | 14409.818           | 1                                       |
| 3    | 0      | 3      | 1.5  | 2     | 1       | 2       | 1.5   | 14414.189           | 2                                       |
| 3    | 0      | 3      | 2.5  | 2     | 0       | 2       | 1.5   | 16048.571           | 2                                       |
| 3    | 0      | 3      | 3.5  | 2     | 0       | 2       | 2.5   | 16049.982           | 1                                       |
| 3    | 0      | 3      | 4.5  | 2     | 0       | 2       | 3.5   | 16050.308           | -5                                      |
| 3    | 1      | 3      | 3.5  | 2     | 0       | 2       | 3.5   | 17086.077           | -2                                      |
| 3    | 1      | 3      | 1.5  | 2     | 0       | 2       | 0.5   | 17090.561           | -2                                      |
| 3    | 1      | 3      | 2.5  | 2     | 0       | 2       | 1.5   | 17090.715           | 4                                       |
| 3    | 1      | 3      | 4.5  | 2     | 0       | 2       | 3.5   | 17092.190           | -1                                      |
| 3    | 1      | 3      | 3.5  | 2     | 0       | 2       | 2.5   | 17092.355           | -3                                      |
| 3    | 1      | 3      | 2.5  | 2     | 0       | 2       | 2.5   | 17095.208           | 2                                       |
| 3    | 1      | 3      | 1.5  | 2     | 0       | 2       | 1.5   | 17096.829           | 0                                       |
| 3    | 1      | 2      | 3.5  | 2     | 1       | 1       | 2.5   | 17540.366           | 1                                       |
| 3    | 1      | 2      | 4.5  | 2     | 1       | 1       | 3.5   | 17541.961           | 1                                       |
| 2    | 2      | 1      | 1.5  | 1     | 1       | 0       | 1.5   | 18360.118           | 2                                       |
| 2    | 2      | 1      | 0.5  | 1     | 1       | 0       | 0.5   | 18362.257           | -3                                      |
| 2    | 2      | 1      | 3.5  | 1     | 1       | 0       | 2.5   | 18362.949           | -1                                      |
| 2    | 2      | 1      | 2.5  | 1     | 1       | 0       | 1.5   | 18364.440           | -1                                      |
| 2    | 2      | 1      | 1.5  | 1     | 1       | 0       | 0.5   | 18368.273           | 1                                       |
| 2    | 2      | 1      | 2.5  | 1     | 1       | 0       | 2.5   | 18368.992           | 2                                       |
| 2    | 2      | 0      | 3.5  | 1     | 1       | 1       | 2.5   | 19208.570           | -4                                      |
| 2    | 2      | 0      | 1.5  | 1     | 1       | 1       | 1.5   | 19208.858           | 1                                       |
| 2    | 2      | 0      | 1.5  | 1     | 1       | 1       | 0.5   | 19211.556           | 0                                       |
| 2    | 2      | 0      | 2.5  | 1     | 1       | 1       | 1.5   | 19213.354           | 0                                       |
| 2    | 2      | 0      | 2.5  | 1     | 1       | 1       | 2.5   | 19214.855           | 2                                       |
| 4    | 1      | 4      | 3.5  | 3     | 0       | 3       | 2.5   | 21512.917           | -4                                      |
| 4    | 1      | 4      | 2.5  | 3     | 0       | 3       | 1.5   | 21513.123           | 3                                       |



---

---

|   |   |   |     |   |   |   |     |           |    |
|---|---|---|-----|---|---|---|-----|-----------|----|
| 4 | 1 | 4 | 4.5 | 3 | 0 | 3 | 3.5 | 21513.615 | 1  |
| 4 | 1 | 4 | 5.5 | 3 | 0 | 3 | 4.5 | 21513.820 | -1 |
| 3 | 2 | 2 | 1.5 | 2 | 1 | 1 | 0.5 | 23188.371 | -1 |
| 3 | 2 | 2 | 3.5 | 2 | 1 | 1 | 3.5 | 23189.448 | 1  |
| 3 | 2 | 2 | 2.5 | 2 | 1 | 1 | 1.5 | 23189.871 | 1  |
| 3 | 2 | 2 | 1.5 | 2 | 1 | 1 | 1.5 | 23189.871 | 0  |
| 3 | 2 | 2 | 2.5 | 2 | 1 | 1 | 2.5 | 23190.946 | 0  |
| 3 | 2 | 2 | 3.5 | 2 | 1 | 1 | 2.5 | 23190.946 | 3  |

---

---

### **FTMW-MW/mmW double-resonance spectroscopy**

A scheme of the arrangement of the MW/millimeter-wave radiation and the FTMW cavity is shown in Figure S1. In the experimental procedure, the FID signal of a known rotational transition is monitored with ordinary FTMW spectroscopy. The microwave or millimeter-wave radiation is guided into the center of the FTMW chamber from a horn through a Teflon window perpendicular to the directions of the microwave and the molecular beam. The standing wave of the incident microwave, the pump radiation of microwave/millimeter-wave, and the supersonic jet intersect at the center of the vacuum chamber as shown in Figure S1. Sources of the pump radiations are two synthesizers (Rohde & Schwartz, SMR-40, 1-40 GHz and Anritsu MG3692G, 1-20 GHz) and a frequency doubler (MITEQ MAX2M200400-20P). A microwave/millimeter-wave detector for each frequency region is located at the opposite side of the pump radiation source to check its power.

The frequency of the pump radiation is scanned with an appropriate frequency step and a number of accumulations at each step depending on the experimental conditions and purposes as described later. When the pump radiation is resonant to a transition, connecting the upper or lower level of the monitored microwave transition, a double-resonance spectrum is observed as a change of the intensity of the monitored microwave signal, confirming or not the identity of the observed transitions. The frequency step of a scan is set to 50-200 kHz for a spectral search in a wide frequency region, because the double-resonance signal easily saturates and is broadened when the incident power of the pump radiation is not attenuated, where the full width half maximum (FWHM) width of a double-resonance signal exceeds 200 kHz for ordinary allowed transitions. However, such a wide frequency scan does not provide accurate transition frequencies. Fine scans are performed to determine accurate transition frequencies. In the fine scans, the step size is reduced to 5-10 kHz and the power of the pump radiation is attenuated to decrease the power saturation. The FWHM of a typical double-resonance spectrum is reduced to about 40-80 kHz for ordinary transitions. The transition frequencies are obtained by Gaussian fittings of the profiles of the double-resonance spectra.

Figure S1. Experimental arrangement of the double-resonance spectrometer.

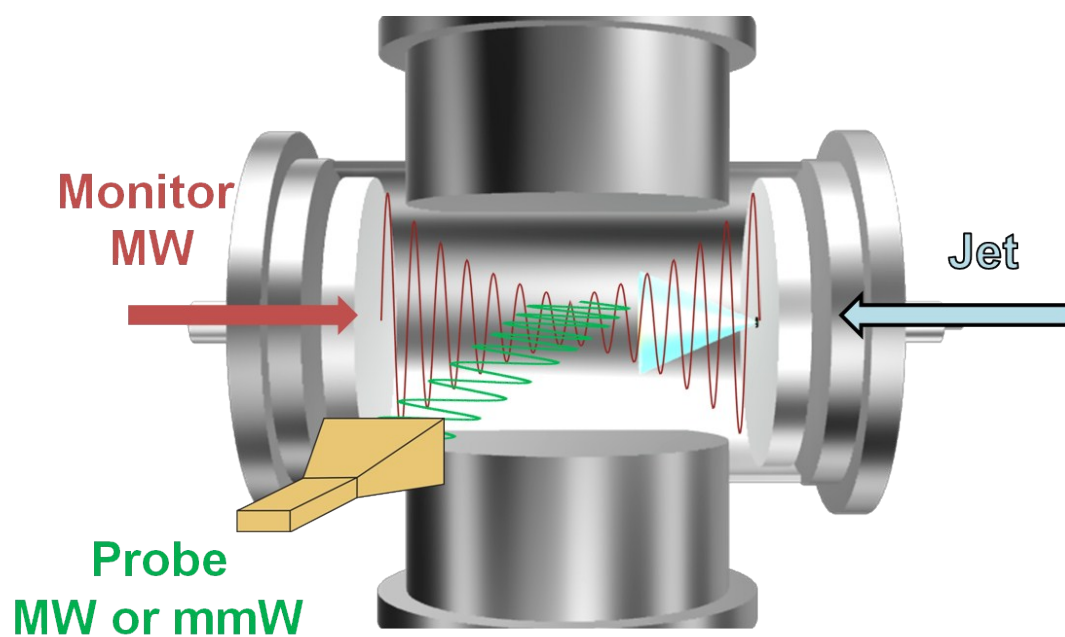

Supplement: c8cp04171g1.pdf [file c8cp04171g1.pdf]
